# Supplementary material
Source: ML conference proceedings conference paper supplement (https://openreview.net/forum?id=snClL0drE-A)
Supplement: supplementary_material [file attachment]

# Time-to-Saccade Metrics for Real-World Evaluation

**Tim Rolf**

**Niklas Stein**

**Markus Lappe**

**Frank Steinicke**

**Simone Frintrop**

TIM.ROLFF@UNI-HAMBURG.DE *Universität Hamburg*

NIKLAS.STEIN@WWU.DE *University of Münster*

MLAPPE@UNI-MUENSTER.DE *University of Münster*

FRANK.STEINICKE@UNI-HAMBURG.DE *Universität Hamburg*

SIMONE.FRINTROP@UNI-HAMBURG.DE *Universität Hamburg*

## Abstract

In this paper, we explore metrics for the evaluation of time-to-saccade problems. We define a new sampling strategy that takes the temporal nature of gaze data and time-to-saccade problems into account, avoiding samples of the same event in different datasets. This allows us to define novel error metrics for a more intuitive evaluation of predicted durations. The metrics are defined to evaluate the consistency of a predictor and the evaluation of the error over time. We evaluate our method using a state-of-the-art method for time-to-saccade prediction along with an average baseline on three different datasets.

**Keywords:** time-to-saccade prediction, gaze classification, time-to-event, metrics

## 1. Extended evaluation

To provide a more detailed evaluation on the proposed metrics of our paper, we also evaluate against five different baseline predictors, namely:

- **Zero predictor (zero):** Predicts an event for every step by reporting a time-to-event of zero. This should result in high undershot and low overshoot rates. Furthermore, it should have a good but not zero consistency.
- **Maximum predictor (max):** This predicts the maximum time-to-event. This should result in high overshoot and low undershot rates. Similar to the zero predictor, it should also have a good consistency. However, we also expect this to perform the worst out of all predictors on the mean square and mean absolute error.
- **Random predictor (rand):** Predicts a uniformly distributed random event length as the start of a sequence and consistently reduces the time-to-saccade by the update rate of the eye-tracker. Once, we predict a time-to-event below zero, we just report that the event is going to happen every step. We expect this predictor to have an overshoot and undershoot rate of 0.5 and an excellent consistency, due to its definition.

Using those predictors, we measure how the proposed metrics behave on the DGaze [Hu et al. \(2020\)](#), FixationNet [Hu et al. \(2021\)](#) and EGTEA Gaze+ [Li et al. \(2018\)](#) datasets.

First, Tab. 1 shows the evaluation of the zero predictor, which will report a time-to-event of zero. As expected, it is evident that the predictor undershoots every prediction, which is also shown through the undershot rate. This also results in a high undershot error, as the full sequence undershoots the actual target. Second, Tab. 2 shows the evaluation of the random predictor. As predicted, this predictor has a much lower undershot rate and very high

consistency. However, it does not reach a 0.5 overshoot and undershoot rate. This might be due to the uniform sampling that does not reflect the general distribution of the data. At last, Tab. 3 shows the maximum predictor. Here, it is shown that the predictor does not produce any undershoots and thus has an excellent undershoot error. However, this also results in the highest average time-to-saccade errors, meaning that it does not well in its prediction. Moreover, Fig. 1 and Fig. 2 show the overshoot and undershoot rate using 10 sections to visualize the behavior of the overshoot and undershoot over time. As expected, the zero and maximum predictors have the highest over- and undershoot rate across the sequence lengths. Whereas, the random predictor is consistently at a 0.6 overshoot and 0.4 undershoot rate. It can also be inferred that the mean and SGD predictors tend to overshoot as the sequence reaches the event.

Table 1: Results of the zero predictor using the metrics described in Sec. 3 of the main paper and the mean square error (mse) and mean absolute error (mae). A lower error is preferred in all cases.

| Metric          | DGaze                 | FixationNet           | EGTEA                 |
|-----------------|-----------------------|-----------------------|-----------------------|
| mse↓            | 0.5168 s <sup>2</sup> | 0.6695 s <sup>2</sup> | 0.5168 s <sup>2</sup> |
| mae↓            | 0.5434 s              | 0.6408 s              | 0.5434 s              |
| avg. tts mse↓   | 0.2089 s <sup>2</sup> | 0.3088 s <sup>2</sup> | 0.2000 s <sup>2</sup> |
| avg. tts mae↓   | 0.4066 s              | 0.3831 s              | 0.3733 s              |
| undershot mse↓  | 0.2089 s <sup>2</sup> | 0.3088 s <sup>2</sup> | 0.2000 s <sup>2</sup> |
| undershot mae↓  | 0.4066 s              | 0.3831 s              | 0.3733 s              |
| overshot rate↓  | 0.0                   | 0.0                   | 0.0                   |
| undershot rate↓ | 1.0                   | 1.0                   | 1.0                   |
| consistency↓    | 1.0                   | 1.0                   | 1.0                   |

Table 2: Results of the random predictor using the metrics described in Sec. 3 of the main paper and the mean square error (mse) and mean absolute error (mae). A lower error is preferred in all cases.

| Metric          | DGaze                 | FixationNet           | EGTEA                 |
|-----------------|-----------------------|-----------------------|-----------------------|
| mse↓            | 0.4585 s <sup>2</sup> | 0.6805 s <sup>2</sup> | 0.7973 s <sup>2</sup> |
| mae↓            | 0.5384 s              | 0.6526 s              | 0.7066 s              |
| avg. tts mse↓   | 0.5097 s <sup>2</sup> | 0.7877 s <sup>2</sup> | 0.9966 s <sup>2</sup> |
| avg. tts mae↓   | 0.5742 s              | 0.1017 s              | 0.8003 s              |
| undershot mse↓  | 0.0653 s <sup>2</sup> | 0.1017 s <sup>2</sup> | 0.0575 s <sup>2</sup> |
| undershot mae↓  | 0.1306 s              | 0.1620 s              | 0.1006 s              |
| overshot rate↓  | 0.62                  | 0.62                  | 0.72                  |
| undershot rate↓ | 0.38                  | 0.38                  | 0.28                  |
| consistency↓    | 0.24                  | 0.25                  | 0.20                  |

## References

- Zhiming Hu, Sheng Li, Congyi Zhang, Kangrui Yi, Guoping Wang, and Dinesh Manocha. Dgaze: Cnn-based gaze prediction in dynamic scenes. *IEEE Transactions on Visualization and Computer Graphics (TVCG)*, 26(5):1902–1911, 2020.
- Zhiming Hu, Andreas Bulling, Sheng Li, and Guoping Wang. Fixationnet: Forecasting eye fixations in task-oriented virtual environments. *IEEE Transactions on Visualization and Computer Graphics (TVCG)*, 27(5):2681–2690, 2021.
- Yin Li, Miao Liu, and James M Rehg. In the eye of beholder: Joint learning of gaze and actions in first person video. In *Proceedings of the European Conference on Computer Vision (ECCV)*, pages 619–635, 2018.

Table 3: Results of the maximum predictor using the metrics described in Sec. 3 of the main paper and the mean square error (mse) and mean absolute error (mae). A lower error is preferred in all cases.

| Metric          | DGaze                 | FixationNet           | EGTEA                 |
|-----------------|-----------------------|-----------------------|-----------------------|
| mse↓            | 2.7385 s <sup>2</sup> | 3.9040 s <sup>2</sup> | 4.1814 s <sup>2</sup> |
| mae↓            | 1.6050 s              | 1.9092 s              | 1.9899 s              |
| avg. tts mse↓   | 2.9792 s <sup>2</sup> | 4.3473 s <sup>2</sup> | 4.7266 s <sup>2</sup> |
| avg. tts mae↓   | 1.7134 s              | 2.0669 s              | 2.1601 s              |
| undershot mse↓  | 0.0000 s <sup>2</sup> | 0.0000 s <sup>2</sup> | 0.0000 s <sup>2</sup> |
| undershot mae↓  | 0.0000 s              | 0.0000 s              | 0.0000 s              |
| overshot rate↓  | 1.0                   | 1.0                   | 1.0                   |
| undershot rate↓ | 0.0                   | 0.0                   | 0.0                   |
| consistency↓    | 1.0                   | 1.0                   | 1.0                   |

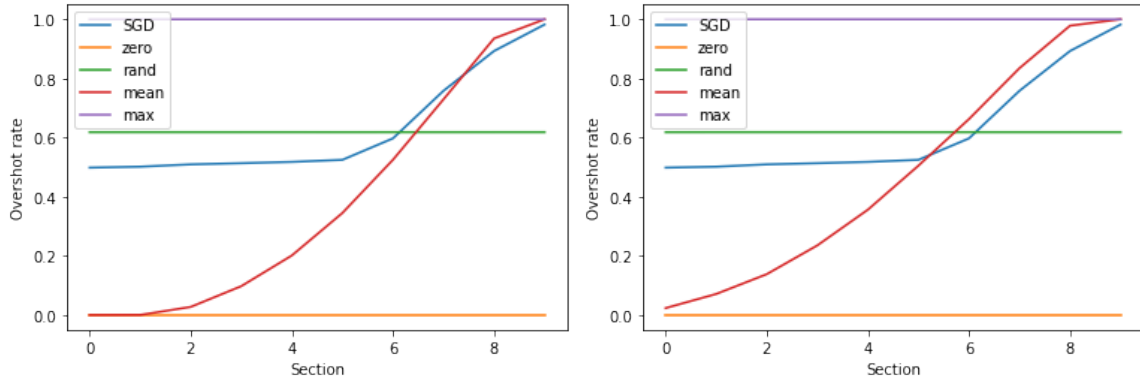

Figure 1: Overshot rate calculated over 10 sections on the DGaze [Hu et al. \(2020\)](#) and FixationNet [Hu et al. \(2021\)](#) datasets.

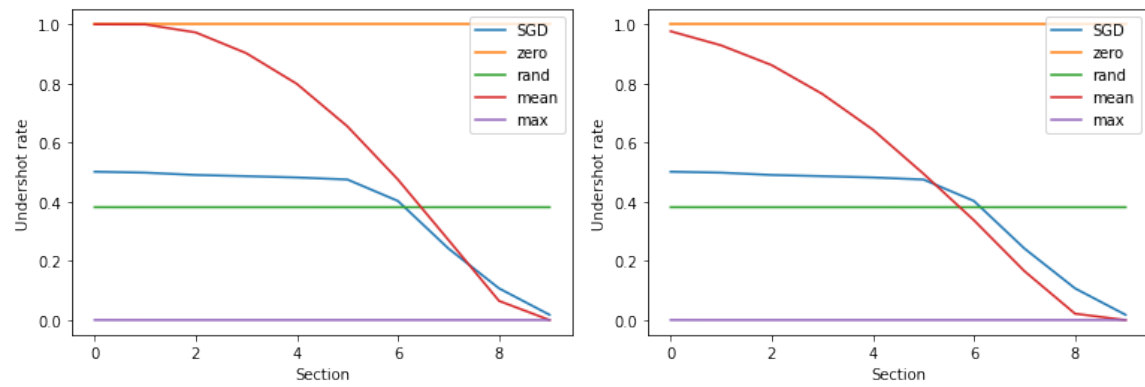

Figure 2: Undershot rate calculated over 10 sections on the DGaze [Hu et al. \(2020\)](#) and FixationNet [Hu et al. \(2021\)](#) datasets.
